# Supplementary material for: Clinically relevant HIF-1α-dependent metabolic reprogramming in oropharyngeal squamous cell carcinomas includes coordinated activation of CAIX and the miR-210/ISCU signaling axis, but not MCT1 and MCT4 upregulation
Source: PubMed Central journal article supplement (PMC5355133; doi:10.18632/oncotarget.14629), 2017-01-13
Supplement: oncotarget-08-13730-s001.pdf [file oncotarget-08-13730-s001.pdf]

## Clinically relevant HIF-1 $\alpha$ -dependent metabolic reprogramming in oropharyngeal squamous cell carcinomas includes coordinated activation of CAIX and the miR-210/ISCU signaling axis, but not MCT1 and MCT4 upregulation

### Supplementary Materials

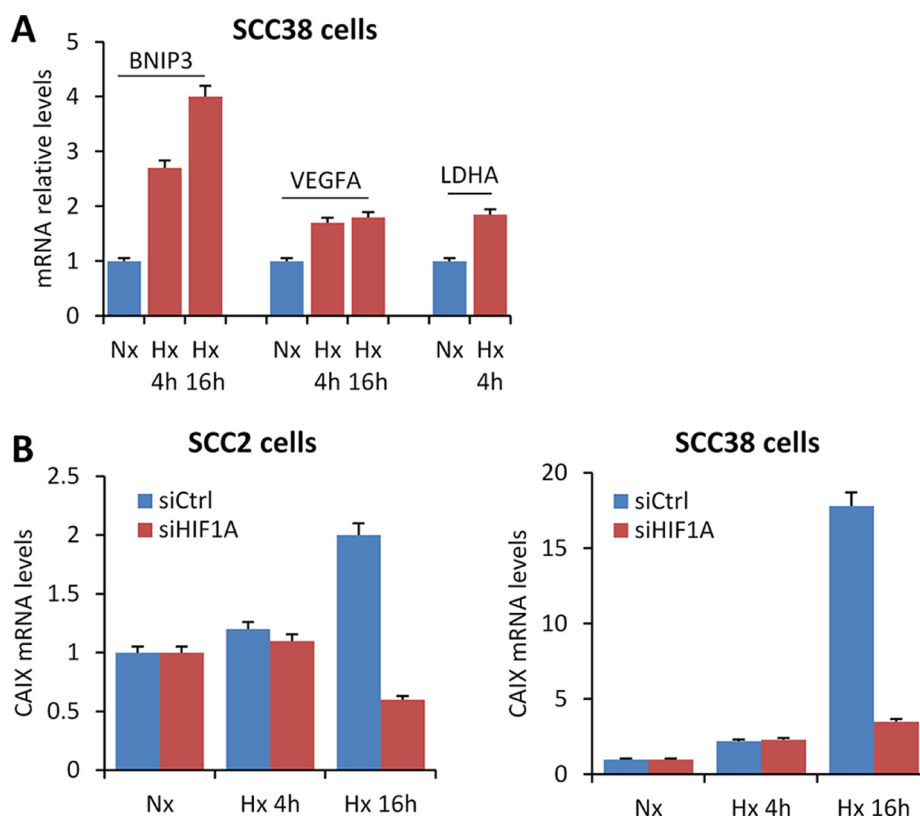

**Supplementary Figure 1: Time-dependent expression of HIF-1 $\alpha$  target genes in SCC-derived cell lines.** (A) SCC cells were exposed to normoxia (Nx, 21% O<sub>2</sub>) or hypoxia (Hx, 1% O<sub>2</sub>) for the indicated periods of time before mRNA quantifications. (B) CAIX mRNA levels were analyzed in the indicated cells following treatment with HIF-1 $\alpha$  (siHIF1A) or control (siCtrl) siRNAs. 24 hours after transfection, cells were incubated under normoxic (Nx) or hypoxic (Hx, 1% O<sub>2</sub>) conditions for the indicated periods of time. Values are expressed as mean ratios  $\pm$  SD.

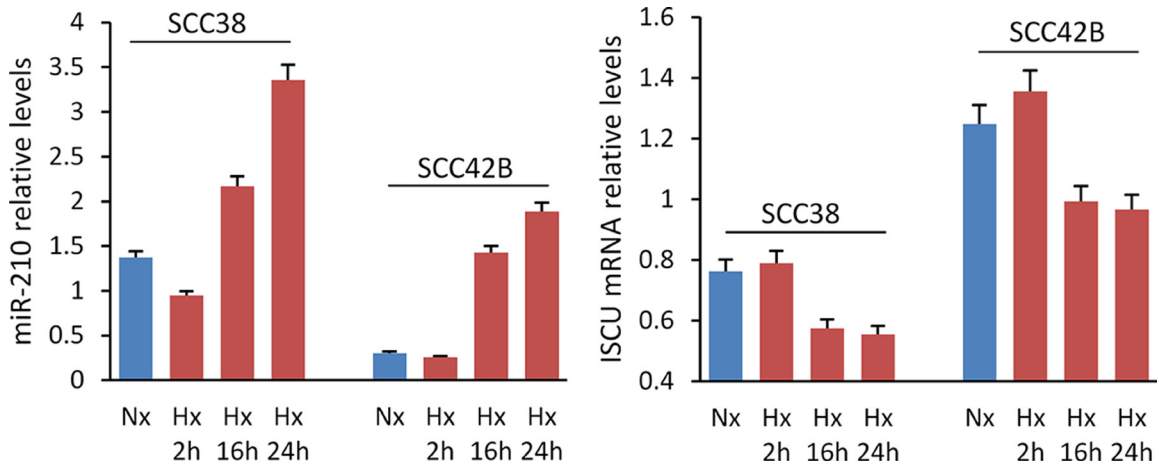

**Supplementary Figure 2: Time-dependent expression of miR-210 and ISCU in SCC-derived cell lines.** The indicated SCC cell lines were exposed to normoxia (Nx, 21% O<sub>2</sub>) or hypoxia (Hx, 1% O<sub>2</sub>) for the indicated periods of time before mRNA quantifications. miR-210 over-expression requires long-term periods of incubation to hypoxia ( $\geq 16$  h), as expected for a transcriptional inducer of miR-210. Reduced levels of ISCU were detected at the same time points. Values are expressed as mean ratios  $\pm$  SD.

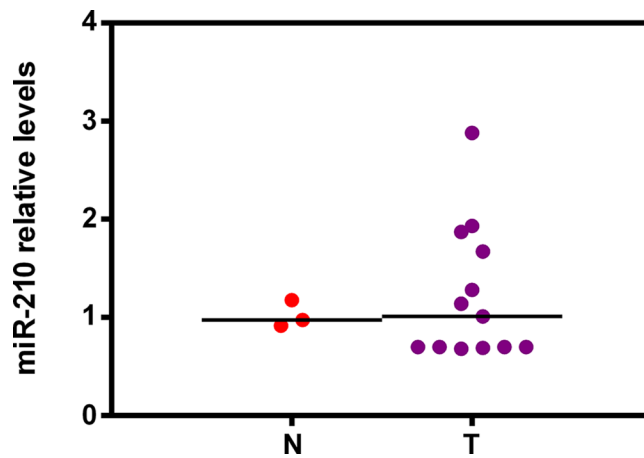

**Supplementary Figure 3: Comparison of miR-210 levels in normal oropharyngeal mucosa and tumor tissue samples.** miR-210 levels were quantified in 3 normal mucosa from non-cancerous patients and 14 tumor tissues.
